# Supplementary material for: Polarization and migration in the zebrafish posterior lateral line system
Source: PubMed Central journal article supplement (PMC5393887; doi:10.1371/journal.pcbi.1005451), 2017-04-03
Supplement: pcbi.1005451.s001.pdf [file pcbi.1005451.s001.pdf]

## S1 Text. Model equations, derivation and scaling

The receptor equations, from Eqs. (4) are

$$\frac{dF_R}{dt} = E_F(W_B) - r_F F_R = \frac{E_{F,1}}{1 + (W_B/W_0)^n} - r_F F_R \quad (8a)$$

$$\frac{dW_R}{dt} = E_W(F_B) - r_W W_R = \frac{E_{W,1}}{1 + (F_B/F_0)^m} - r_W W_R. \quad (8b)$$

We wish to recast this in terms of  $F_R, W_R$  alone. Based on Michaelis-Menten kinetics, Eqs. (3), the bound receptors are given by

$$F_B(t) = \frac{F_R(t)F(t)}{K_F + F} = F_R(t) \frac{(F/K_F)}{1 + (F/K_F)} = F_R(t) s_F(F/K_F) \quad (9a)$$

$$W_B(t) = \frac{W_R(t)W(t)}{K_W + W} = W_R(t) \frac{(W/K_W)}{1 + (W/K_W)} = W_R(t) s_W(W/K_W) \quad (9b)$$

where we have defined the two functions

$$s_F(x) = \frac{x}{1+x}, \quad s_W(x) = \frac{x}{1+x}.$$

Now the ligand dependence is in the expressions  $s_F, s_W$  which represent the fraction of bound receptors for a given level of ligand concentration (relative to the ligand  $K_D$ ). Note that both functions satisfy  $0 \leq s_j(x) \leq 1$ . We scale the FGF (respectively Wnt) ligand concentration by  $K_F$  (respectively  $K_W$ ).

Substituting these expressions into the receptor dynamics equations leads to

$$\frac{dF_R}{dt} = r_F \left[ \left( \frac{F_1}{1 + (W_R s_W/W_0)^m} \right) - F_R \right] \quad (10a)$$

$$\frac{dW_R}{dt} = r_W \left[ \frac{W_1}{1 + (F_R s_F/F_0)^n} - W_R \right]. \quad (10b)$$

We scale the FGF receptors by  $F_1$  and the Wnt receptors by  $W_1$ . Then the result is

$$\frac{dF_R}{dt} = r_F \left[ \frac{1}{1 + (W_R/\omega)^m} - F_R \right] \quad (11a)$$

$$\frac{dW_R}{dt} = r_W \left[ \frac{1}{1 + (F_R/\phi)^n} - W_R \right] \quad (11b)$$

where

$$\phi = F_0/(F_1 s_F), \quad \omega = W_0/(W_1 s_W). \quad (11c)$$

Note that as ligand concentration  $F$  (respectively  $W$ ) decreases,  $s_F$  (respectively  $s_W$ ) decreases, and so  $\phi$  (respectively  $\omega$ ) increases. Now Eqs. (11)a,b are in the form of a mutual inhibition module and have a number of possible behaviours that depend on parameters  $\phi$  and  $\omega$ , as shown in Fig. 4.

In 1D, the ligand equations are

$$\frac{\partial F}{\partial t} = D_F \frac{\partial^2 F}{\partial x^2} - \delta_F F - \text{rate of binding} + \text{rate of production} \quad (12a)$$

$$\frac{\partial W}{\partial t} = D_W \frac{\partial^2 W}{\partial x^2} - \delta_W W - \text{rate of binding} + \text{rate of production} \quad (12b)$$

Ligand can bind to unoccupied receptors. Then, based on mass-action, the rates of binding are

$$\text{rate of binding to FGF receptors} = k_{F,\text{on}} F(F_R - F_B) = k_{F,\text{on}} F F_R \left(1 - \frac{F}{K_F + F}\right) \quad (12c)$$

$$\text{rate of binding to Wnt receptors} = k_{W,\text{on}} W(W_R - W_B) = k_{W,\text{on}} W W_R \left(1 - \frac{W}{K_W + W}\right) \quad (12d)$$

where the constants  $K_F, K_W$  are given by

$$K_F = \frac{k_{F,\text{off}} + k_{F,2}}{k_{F,\text{on}}}, \quad K_W = \frac{k_{W,\text{off}} + k_{W,2}}{k_{W,\text{on}}}. \quad (12e)$$

See Fig. 2 for these rate parameters. The binding rates can be simplified to

$$k_{F,\text{on}} F F_R \left(1 - \frac{F}{K_F + F}\right) = k_{F,\text{on}} F F_R \frac{K_F}{K_F + F} = k_{F,\text{on}} F F_R \frac{1}{1 + (F/K_F)}, \quad (12f)$$

$$k_{W,\text{on}} W W_R \left(1 - \frac{W}{K_W + W}\right) = k_{W,\text{on}} W W_R \frac{K_W}{K_W + W} = k_{W,\text{on}} W W_R \frac{1}{1 + (W/K_W)}. \quad (12g)$$

Similarly, the rates of production are

$$\text{rate of production of FGF ligand} = p_F W_B = p_F W_R \frac{W}{K_W + W} \quad (13)$$

$$\text{rate of production of Wnt ligand} = p_W W_B = p_W W_R \frac{W}{K_W + W}. \quad (14)$$

The reaction-diffusion PDEs for ligand concentrations can be written in the form

$$\frac{\partial F}{\partial t} = D_F \frac{\partial^2 F}{\partial x^2} - \delta_F F - k_{F,\text{on}} F F_R \frac{1}{1 + (F/K_F)} + p_F W_R \frac{W}{K_W + W} \quad (15a)$$

$$\frac{\partial W}{\partial t} = D_W \frac{\partial^2 W}{\partial x^2} - \delta_W W - k_{W,\text{on}} W W_R \frac{1}{1 + (W/K_W)} + p_W W_R \frac{W}{K_W + W}. \quad (15b)$$

We now put these in dimensionless form by the following scaling:

$$F = F^* \bar{F}, \quad W = W^* \bar{W},$$

where \*s are dimensionless and bars are the scales. We choose  $\bar{F} = K_F, \bar{W} = K_W$  as noted earlier. We also have scales for distance ( $x = x^* L$ ) and for the receptor levels ( $F_R = F_R^* F_1, W_R = W_R^* W_1$ ) as discussed previously. This gives the dimensionless (except for time) model:

$$\frac{\partial F}{\partial t} = \mathcal{D}_F \frac{\partial^2 F}{\partial x^2} - \delta_F F - \kappa_F F_R \frac{F}{1 + F} + \rho_F W_R \frac{W}{1 + W} \quad (16a)$$

$$\frac{\partial W}{\partial t} = \mathcal{D}_W \frac{\partial^2 W}{\partial x^2} - \delta_W W - \kappa_W W_R \frac{W}{1 + W} + \rho_W W_R \frac{W}{1 + W} \quad (16b)$$

where

$$\mathcal{D}_i = \frac{D_i}{L^2}, \quad \kappa_F = k_{F,\text{on}} F_1, \quad \kappa_W = k_{W,\text{on}} W_1, \quad \rho_F = \frac{p_F W_1}{K_F}, \quad \text{and} \quad \rho_W = \frac{p_W W_1}{K_W}. \quad (16c)$$
